# Supplementary material for: AI-IoT Low-Cost Pollution-Monitoring Sensor Network to Assist Citizens with Respiratory Problems
Source: MDPI journal article supplement (doi:10.3390/s23239585), 2023-12-03
Supplement: s1 [file s1]

---

### Supplementary Materials:

**Table S1.** List of the most harmful air pollutants with a brief description and their maximum values recommended according to WHO Global Air Quality Guidelines. 2023. Available online: <https://apps.who.int/iris/bitstream/handle/10665/345329/9789240034228-eng.pdf> (accessed on 15 March 2022).

|                       |                                                                                                                                                                                                                                                                                                                                                                                                                                                                                                                                                                                                      |
|-----------------------|------------------------------------------------------------------------------------------------------------------------------------------------------------------------------------------------------------------------------------------------------------------------------------------------------------------------------------------------------------------------------------------------------------------------------------------------------------------------------------------------------------------------------------------------------------------------------------------------------|
| <i>PM</i>             | are particles of microscopic size, from different components such as sulphate, nitrates, sodium chloride, mineral dust, to name a few. These particles can have different sizes, with different diameters, usually 1.0, 2.5 and 10 $\mu\text{m}$ . These particles can penetrate deep into the lungs and bloodstream, causing cardiovascular and respiratory diseases. Long-term exposure has been related to adverse perinatal outcomes and lung cancer. The maximum in average recommended is 15 and 45 $\mu\text{g}/\text{m}^3$ in a day for $\text{PM}_{2.5}$ and $\text{PM}_{10}$ respectively. |
| <i>CO</i>             | is a toxic gas without color, odor and taste. It makes difficult the body's cells to get oxygen, causing difficulties breathing. The maximum in average recommended is 4 $\mu\text{g}/\text{m}^3$ in a day.                                                                                                                                                                                                                                                                                                                                                                                          |
| <i>O<sub>3</sub></i>  | or ground level ozone, is formed through the reaction with gases (such as VOCs, CO, and $\text{NO}_2$ ) in the presence of sunlight at ground level. It can cause problems breathing, asthma and lung diseases. The maximum in average recommended is 100 $\mu\text{g}/\text{m}^3$ in 8 hours.                                                                                                                                                                                                                                                                                                       |
| <i>NO<sub>2</sub></i> | is a gas commonly produced in the combustion of fuels, that is a strong oxidant. It irritates airways and worsen respiratory diseases and is an important ozone precursor. The maximum in average recommended is 25 $\mu\text{g}/\text{m}^3$ in 8 hours.                                                                                                                                                                                                                                                                                                                                             |
| <i>SO<sub>2</sub></i> | is a gas with sharp odor and without color. The exposure to this gas is associated with asthma. The maximum in average recommended is 40 $\mu\text{g}/\text{m}^3$ in a day.                                                                                                                                                                                                                                                                                                                                                                                                                          |
| <i>VOCs</i>           | are compounds (usually human-made, such as industrial solvents), common ground-water contaminants. Since there are many different types, usually they are measured as TVOCs.                                                                                                                                                                                                                                                                                                                                                                                                                         |
